# Supplementary material for: Aspalathin, a natural product with the potential to reverse hepatic insulin resistance by improving energy metabolism and mitochondrial respiration
Source: PLoS One. 2019 May 2;14(5):e0216172. doi: 10.1371/journal.pone.0216172 (PMC6497260; doi:10.1371/journal.pone.0216172)
Supplement: S2 Dataset — Original Western blot picture of phosphor-protein kinase B (pAKT) and total-protein kinase B (tAKT), experiment 1 (A, B), experiment 2 (C, D), experiment 3 (E, F) and cropped blot (G). C3A liver cells were cultured in EMEM supplemented with 8 mM glucose with or without 0.75 mM palmitate (Pal) for 16 h, thereafter treated with aspalathin 10 μM for 3 h. Insulin (1 μM) was added during the last 15 min and used as a positive control. Cells were lysed and subjected to Western blot analyses. After probing with pAKT blots were stripped and probed with tAKT. The % of pAKT/tAKT, was used to estimate the level of AKT (Ser 473). All 3 independent experiments were analysed and one representative blot was cropped to be included in the article. Results are from three independent experiments. Please note: G-represents “normal control”, GI is “normal control+ insulin”, P is “palmitate control”, PI is “palmitate+insulin”, GRE is “green rooibos extract”, GRE+I is “green rooibos extract + insulin”, ASP is “aspalathin”, and ASP+I is “aspalathin+ insulin”. (DOCX) [file pone.0216172.s002.docx]

**Aspalathin, a natural product with the potential to reverse hepatic insulin resistance by improving energy metabolism and mitochondrial respiration**

Sithandiwe E. Mazibuko-Mbeje1,2 Phiwayinkosi V. Dludla1,3, Rabia Johnson1,2, Elizabeth Joubert4,5, Johan Louw2,6, Khanyisani Ziqubu2,6, Luca Tiano3, Sonia Silvestri3, Patrick Orlando3, Andy R. Opoku6, Christo J.F. Muller1,2,6

1Biomedical Research and Innovation Platform, South African Medical Research Council, Tygerberg 7505, South Africa.

2Division of Medical Physiology, Faculty of Health Sciences, Stellenbosch University, Tygerberg 7505, South Africa.

3Department of Life and Environmental Sciences, Polytechnic University of Marche, Ancona 60121, Italy.

4Plant Bioactives Group, Post-Harvest and Agro-Processing Technologies, Agricultural Research Council, Infruitec-Nietvoorbij, Stellenbosch 7599, South Africa.

5Department of Food Science, Stellenbosch University, Stellenbosch 7599, South Africa.

6Department of Biochemistry and Microbiology, University of Zululand, KwaDlangezwa 3886, South Africa.

Corresponding author:

Sithandiwe E. Mazibuko-Mbeje, Biomedical Research and Innovation Platform, South African Medical Research Council, Tygerberg 7505, South Africa. Email: sithandiwe.mazibuko@mrc.ac.za. Tel.: +2721 938 0341.

**Material and methods**

**Western blot analysis**

For Western blot analysis, membranes were probed overnight at 4°C with the relevant primary antibodies glucose transporter (GLUT)2, protein kinase B (AKT, p-AKT (Ser 473), 5' AMP-activated protein kinase (AMPK, p-AMPK (Thr172), carnitine palmitoyltransferase 1 (CPT1) and phosphoinositide 3-kinase (PI3K, p-PI3K (p85)) , as well as horseradish peroxidase (HRP) conjugated secondary antibody (β-actin) applied for 1.5h the following day. Chemiluminenscence using a Chemidoc-XRS imager and Quantity One 1-D software (Biorad Laboratories, Hercules, CA, USA) were used detect and quantify proteins. β-actin was used as the reference control.Three independet experimnents were conducted and one blot was selected as a representative. The selected represenative image was croped and image was used to quantify molecular weight size. In some of the the pictures out of 8 lanes loaded only 6 were used as the other treatment [gree rooibos extract (GRE) and green rooibos extract + insulin (GRE+I)] is not discussed in the current article. Molecular weight and band analysis was quantified using image J software.

**Protein kinase B (AKT) original Western blots**

Three independent experiments were conducted for both phosphorylated (pAKT) and total AKT (tAKT), and in all figures, GRE and GRE+I were run on the same blot. However, GRE and GRE+I is not discussed in this paper. Similar tread was attained in all blots (Fig.2A-F). Experiment 2 (Fig.2C and D) was cropped and used as a representative as shown in (Fig. 2G).

A B

Marker kDa G GI P PI GRE GRE+I ASP ASP+I Marker kDa

Marker kDa G GI P PI GRE GRE+I ASP ASP+I Marker kDa


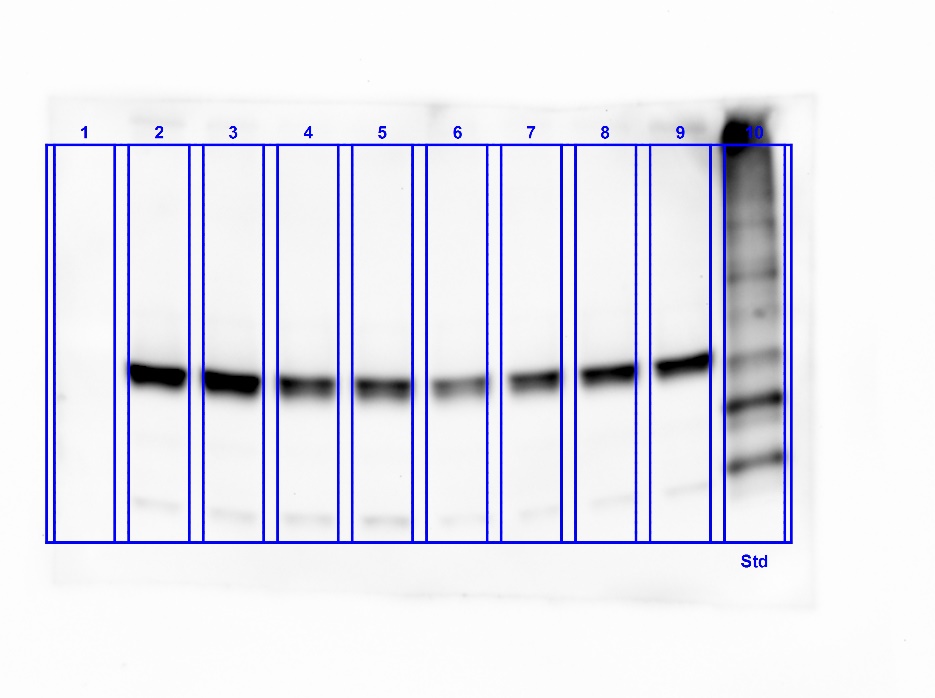

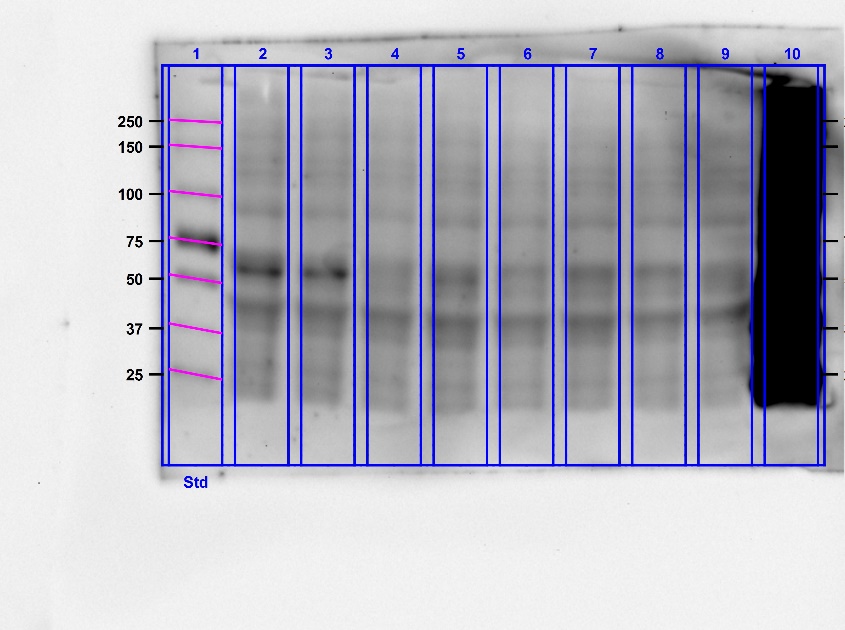


~60 tAKT

~60 pAKT

C D


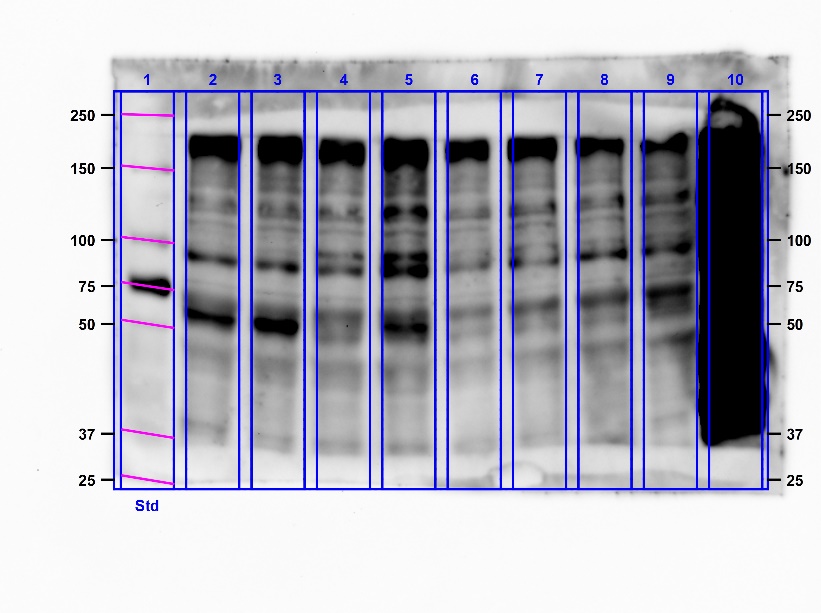


~60 pAKT


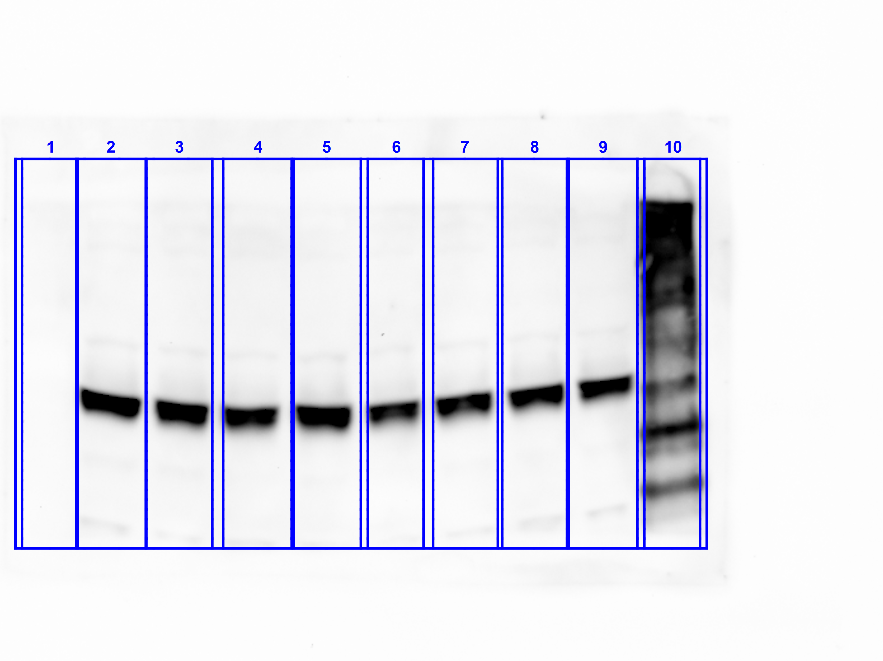


~60 tAKT

Marker kDa G GI P PI GRE GRE+I ASP ASP+I Marker kDa

Marker kDa G GI P PI GRE GRE+I ASP ASP+I Marker kDa

E F

Marker kDa G GI P PI GRE GRE+I ASP ASP+I Marker kDa


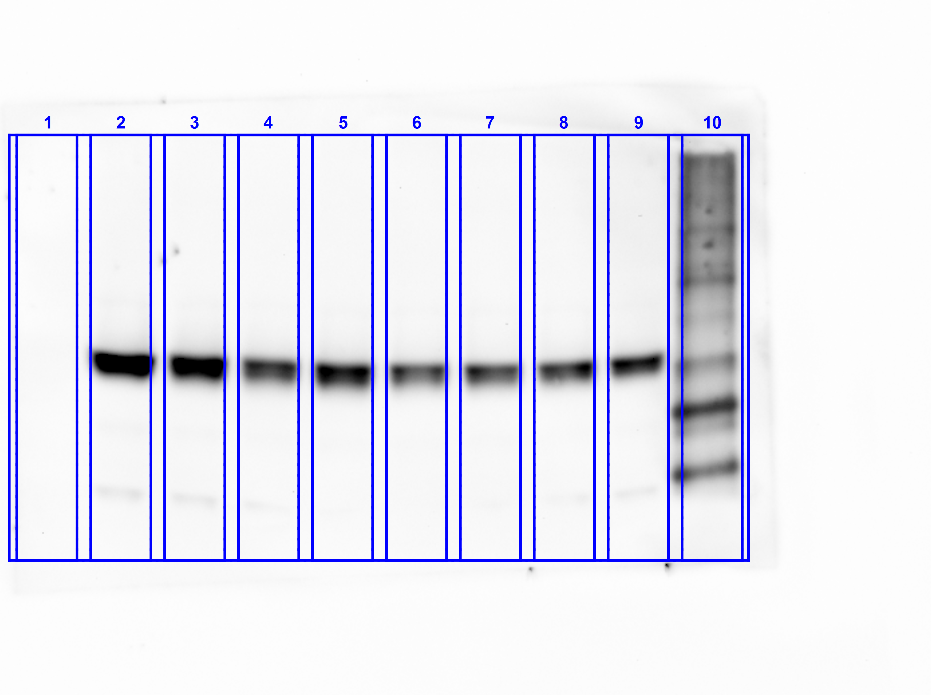

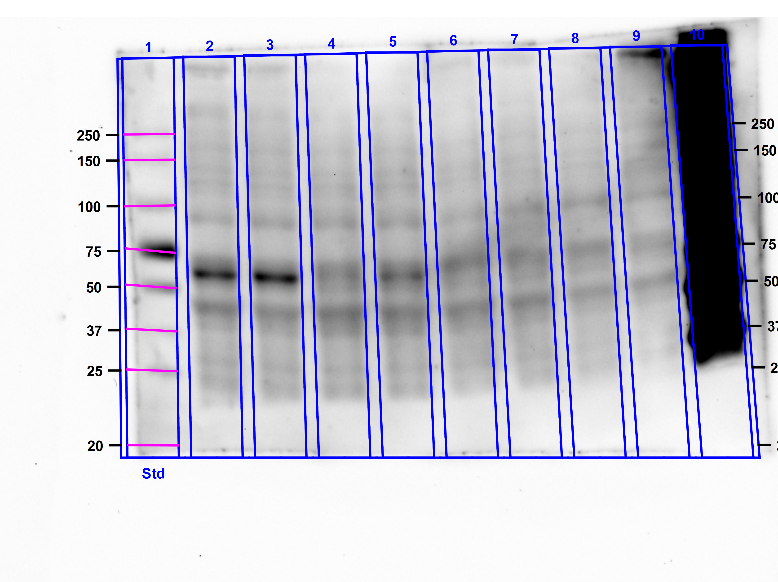


Marker kDa G GI P PI GRE GRE+I ASP ASP+I Marker kDa

~60 tAKT

~60 pAKT

G


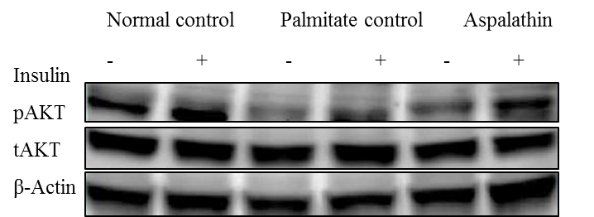


G GI P PI ASP ASP+I

**S2 Data set.**
